# Supplementary material for: A machine learning approach for predicting suicidal ideation in post stroke patients
Source: PubMed Central journal article supplement (PMC9508242; doi:10.1038/s41598-022-19828-8), 2022-09-23
Supplement: 41598_2022_19828_MOESM1_ESM.pdf [file 41598_2022_19828_MOESM1_ESM.pdf]

**Supplementary information 1.** Hyperparameters for each algorithm in the grid search.

| <b>Classifier</b> | <b>Tested values</b>                          | <b>Selected values</b> |
|-------------------|-----------------------------------------------|------------------------|
|                   | n_estimators: 10, 25, 50, 100, 250, 500, 1000 | n_estimators: 500      |
| Xgboost           | learning_rate: 0.001, 0.01, 0.1, 0.2, 0.5     | learning_rate: 0.01    |
|                   | max_depth: 2, 3, 5, 10, 25, 50, 100           | max_depth: 3           |
|                   | n_estimators: 10, 25, 50, 100, 250, 500, 1000 | n_estimators: 1000     |
| CatBoost          | learning_rate: 0.001, 0.01, 0.1, 0.2, 0.5     | learning_rate: 0.01    |
|                   | max_depth: 2, 3, 5, 10, 25, 50, 100           | max_depth: 10          |
|                   | n_estimators: 10, 25, 50, 100, 250, 500, 1000 | n_estimators: 250      |
| LGBM              | learning_rate: 0.001, 0.01, 0.1, 0.2, 0.5     | learning_rate: 0.1     |
|                   | max_depth: 2, 3, 5, 10, 25, 50, 100           | max_depth: 5           |

Abbreviations: LGBM, light gradient boosting model
