# Supplementary material for: A machine learning approach for predicting suicidal ideation in post stroke patients
Source: PubMed Central journal article supplement (PMC9508242; doi:10.1038/s41598-022-19828-8), 2022-09-23
Supplement: 41598_2022_19828_MOESM2_ESM.pdf [file 41598_2022_19828_MOESM2_ESM.pdf]

**Supplementary information 1.****Table 1.** Comparison of machine learning model values (Three boosting model and logistic regression model)

| <b>Classifier</b> | <b>Sensitivity</b> | <b>Specificity</b> | <b>PPV</b> | <b>NPV</b> | <b>Accuracy</b> | <b>AUC</b> |
|-------------------|--------------------|--------------------|------------|------------|-----------------|------------|
| Xgboost           | .813               | .836               | .807       | .842       | .826            | .895       |
| CatBoost          | .921               | .739               | .749       | .917       | .822            | .900       |
| LGBM              | .914               | .746               | .752       | .911       | .822            | .897       |
| LR                | .784               | .838               | .838       | .828       | .832            | .852       |

Abbreviations: PPV, positive predict value; NPV, negative predict value; AUC, area under the receiver operating characteristics curve; LGBM, light gradient boosting model; LR, logistic regression
