# Supplementary material for: A machine learning approach for predicting suicidal ideation in post stroke patients
Source: PubMed Central journal article supplement (PMC9508242; doi:10.1038/s41598-022-19828-8), 2022-09-23
Supplement: 41598_2022_19828_MOESM3_ESM.pdf [file 41598_2022_19828_MOESM3_ESM.pdf]

**Supplementary information 2.****Figure 1.** Xgboost model ROC curve graph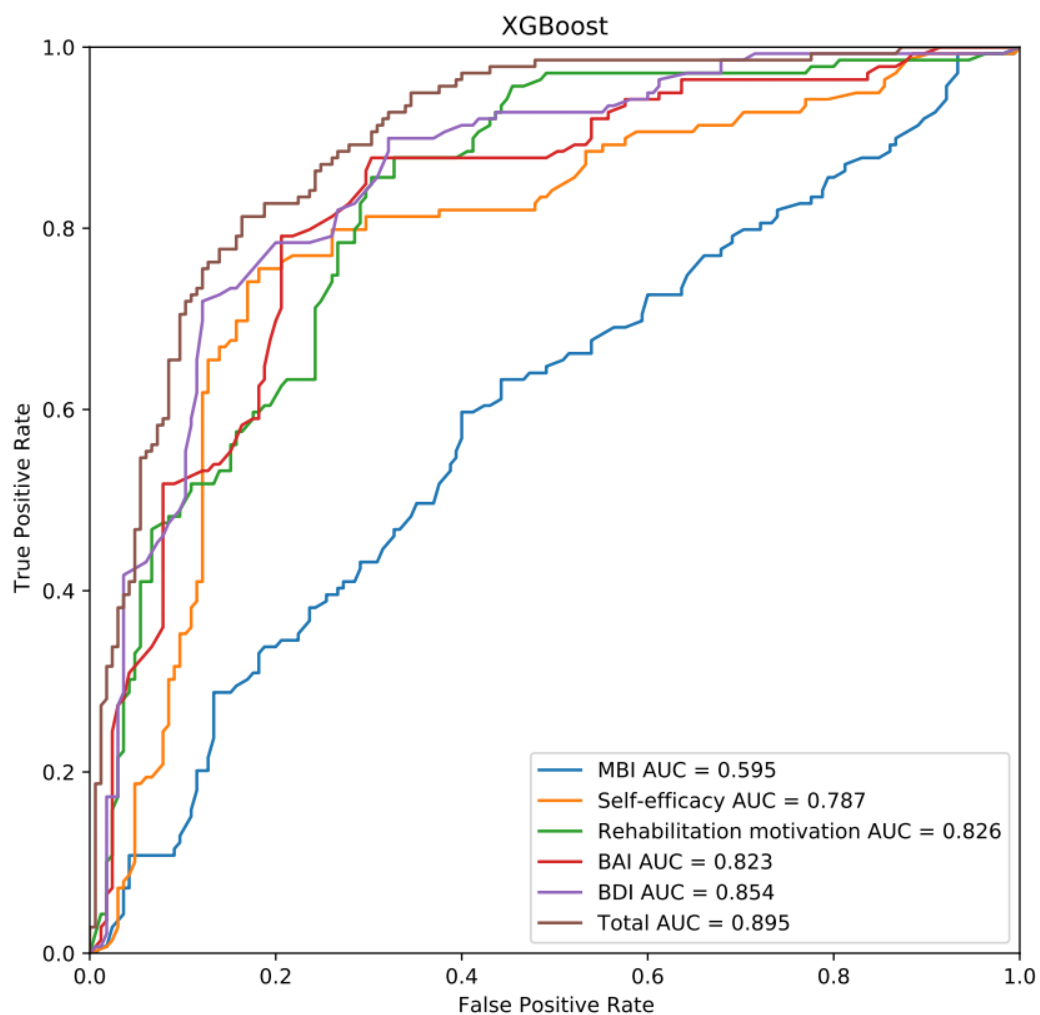

Abbreviations: MBI, modified bathel index; BAI,beck anxiety inventory; BDI, beck depression inventory

**Supplementary information 2.****Figure 2.** CatBoost model ROC curve graph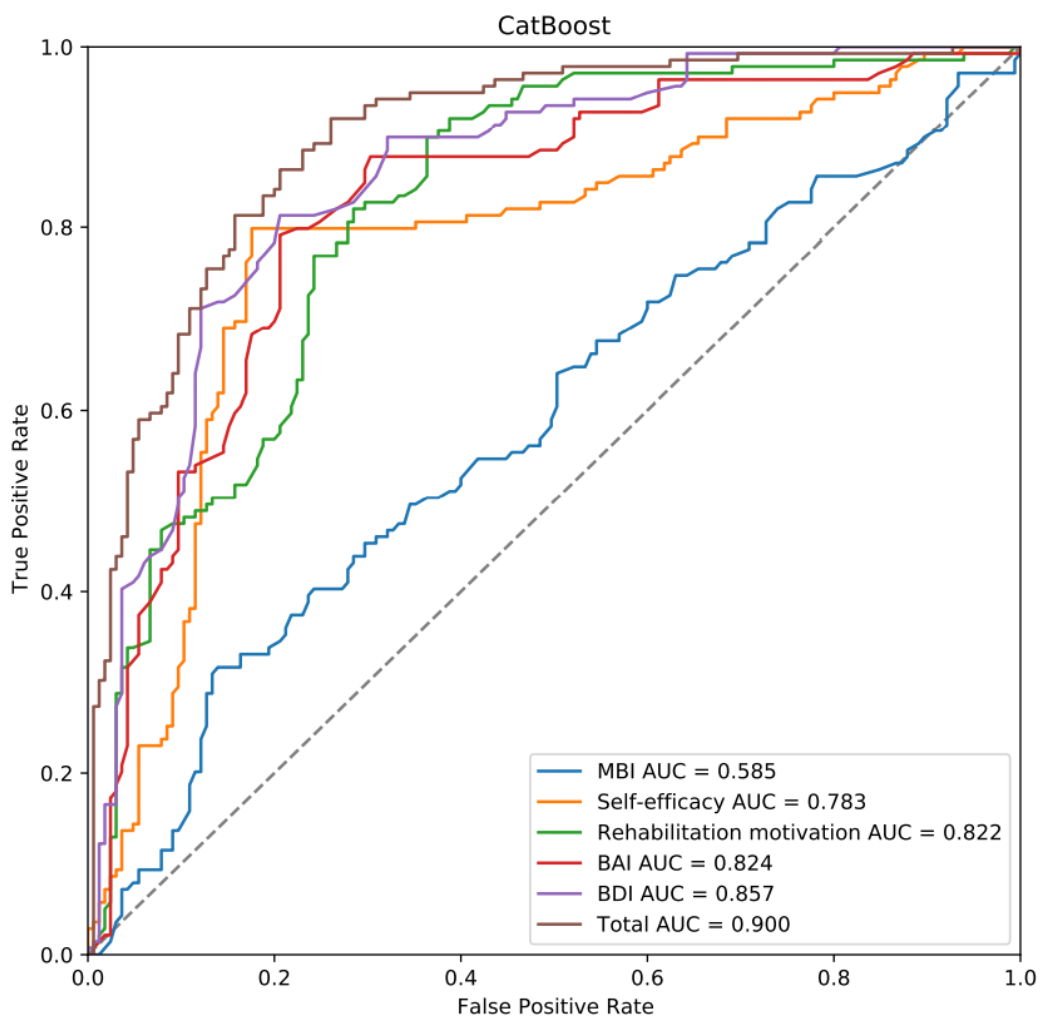

Abbreviations: MBI, modified bathel index; BAI,beck anxiety inventory; BDI, beck depression inventory

**Supplementary information 2.****Figure 3.** Light GBM (LGBM) model ROC curve graph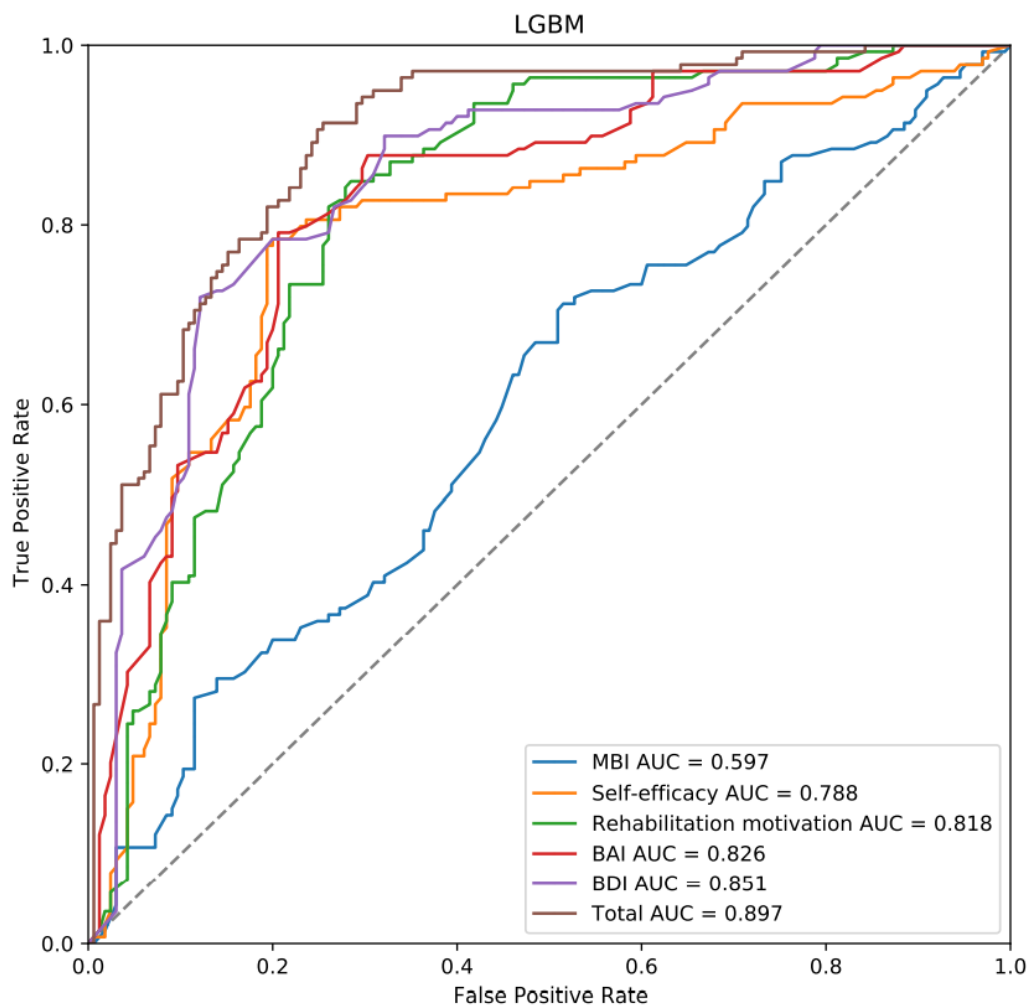

Abbreviations: MBI, modified bathel index; BAI,beck anxiety inventory; BDI, beck depression inventory
